# Supplementary material for: An adhesive SERS substrate based on a stretched silver nanowire-tape for the in situ multicomponent analysis of pesticide residues
Source: Royal Society of Chemistry journal article supplement (doi:10.1039/d3ay00022b), 2023-01-01
Supplement: d3ay00022b1.pdf [file d3ay00022b1.pdf]

## Supporting Information

### **Adhesive SERS substrate based on stretched silver nanowire-tape for in-situ multicomponent analysis of pesticide residues**

Xing Dai<sup>a</sup>, Danni Xue<sup>a</sup>, Xiaohan Liu<sup>a</sup>, Chenjie Gu<sup>a</sup>, Tao Jiang<sup>a,\*</sup>

*<sup>a</sup>Department of Microelectronic Science and Engineering, School of Physical Science and Technology, Ningbo University, Ningbo 315211, Zhejiang, P. R. China*

---

\*Corresponding author: Tao Jiang, E-mail: [jiangtao@nbu.edu.cn](mailto:jiangtao@nbu.edu.cn)

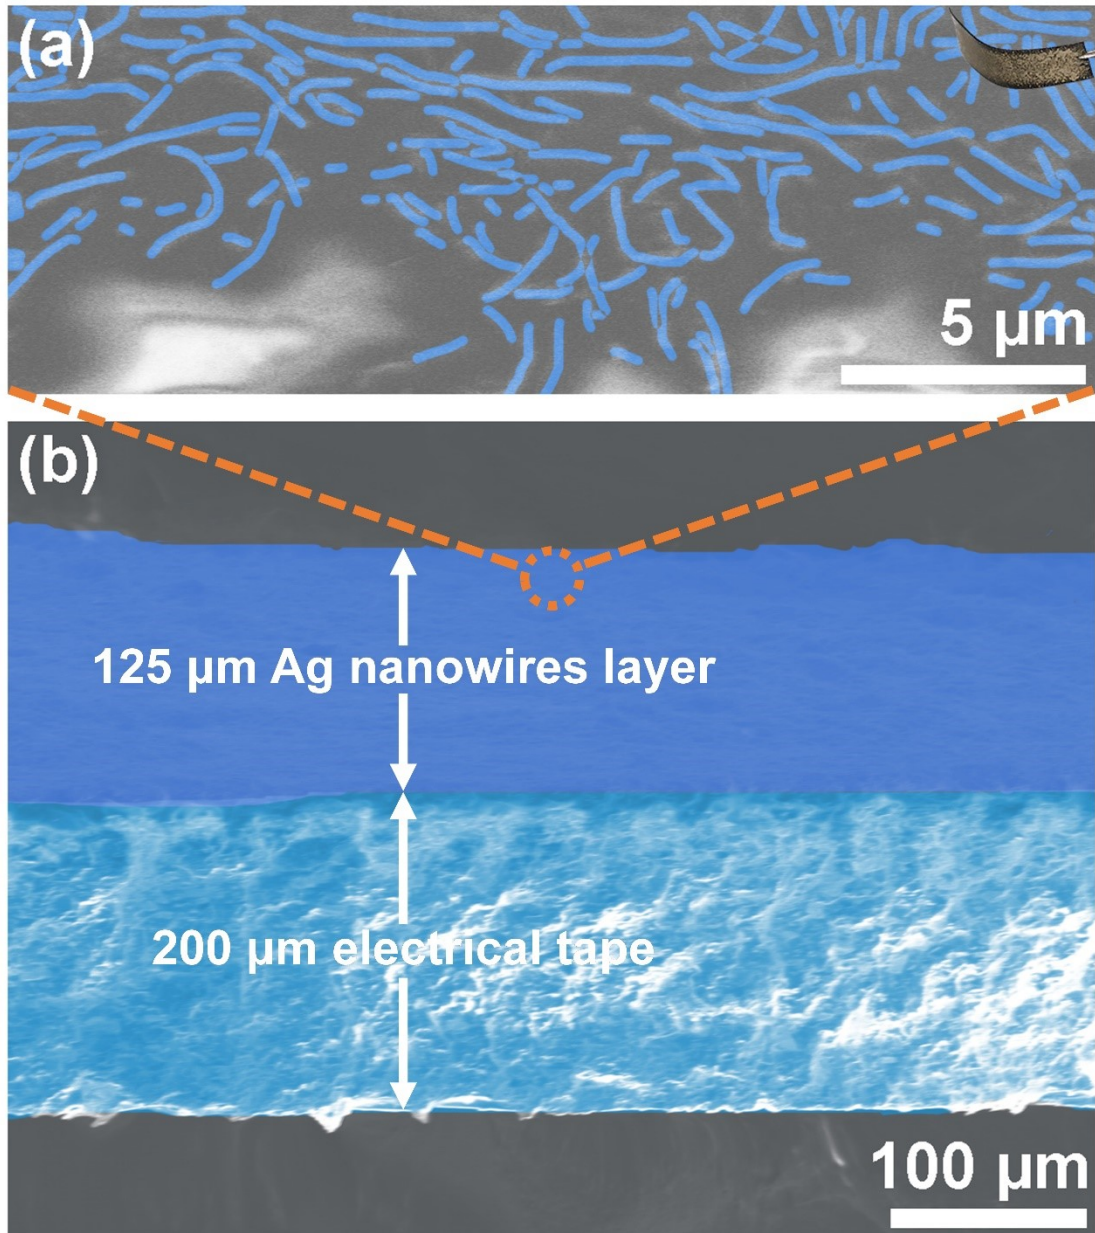

**Fig. S1** (a and b) Cross-sectional SEM image of the Ag NW-tape. (b) is the magnified image of the orange region in (a).

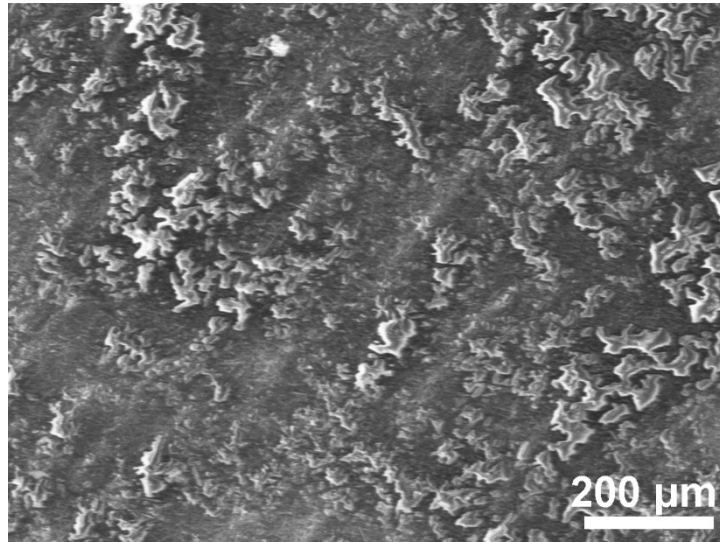

**Fig. S2** SEM images of the stretched Ag NW-tape at the strain of 45%.

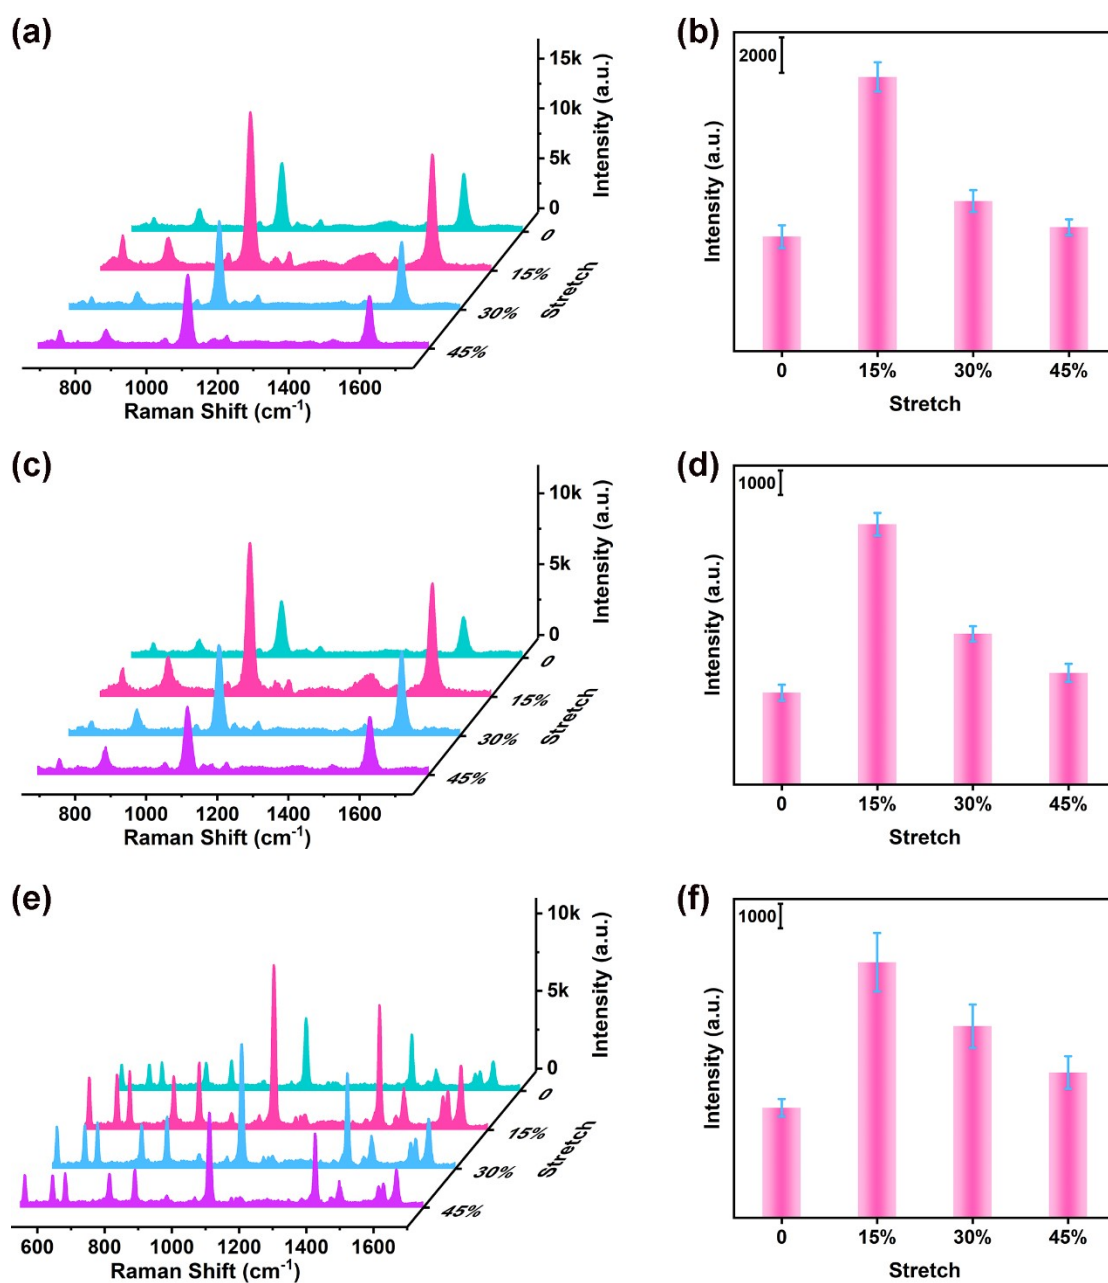

**Fig. S3** SERS spectra of Ag NW-tape substrates under varied strains using diverse probe molecules with different concentrations: (a)  $10^{-3}$  M 4-MBA, (c)  $10^{-5}$  M 4-MBA, (e)  $10^{-3}$  M 2-NAT. (b, d and f) The corresponding histogram of characteristic Raman peak intensity of each target analyte.

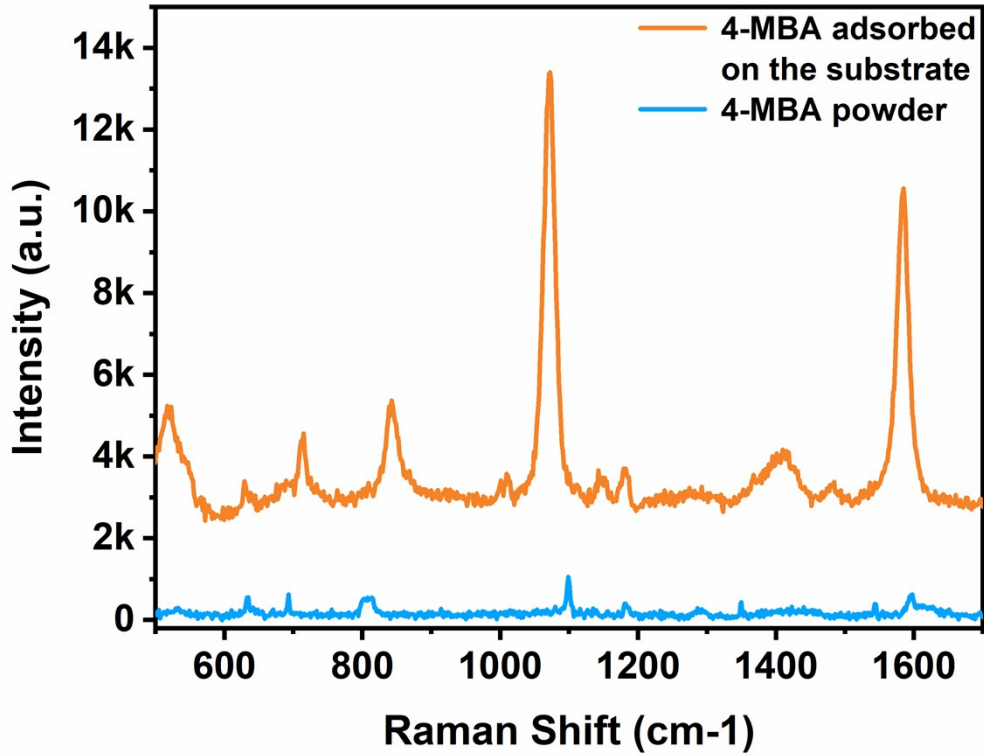

**Fig. S4** SERS spectrum of 4-MBA on the SERS-active substrate and Raman spectrum of 4-MBA powder.

The EF was calculated by the representative equation:  $EF = (I_{SERS}/I_{bulk}) / (N_{SERS}/N_{bulk})$ .

Here,  $I_{SERS}$  and  $I_{bulk}$  are the integrated intensities of the peak at  $1072 \text{ cm}^{-1}$  for 4-MBA adsorbed on the substrate and 4-MBA powder, respectively. The required  $I_{SERS}$  and  $I_{bulk}$  were calculated to be 262198.28 and 24058.81 according to Figure S4, respectively.

Thereafter,  $N_{SERS}$  and  $N_{bulk}$  indicate the effective amount of 4-MBA molecules from the substrate and 4-MBA powder, respectively. The corresponding values were acquired

by the following equations:

$$N_{SERS} = N_A \times S_{illumination} \times \sigma$$

$$N_{bulk} = n_{powder} \times V_{illumination}$$

$$V_{illumination} = \frac{1}{3} \times S_{illumination} \times D_{depth}$$

$$D_{depth} = \frac{\lambda}{(NA)^2}$$

$$\frac{N_{SERS}}{N_{bulk}} = \frac{N_A \times \sigma}{\frac{1}{3} \times n_{powder} \times D_{depth}}$$

The entire molecule number of 100 mg 4-MBA ( $N_{powder}$ ) was calculated to be  $3.90 \times 10^{20}$ . When 100 mg of solid 4-MBA powder was tightly compacted into a cube shape by two clean glasses, its volume ( $V_{powder}$ ) was estimated as  $2.5 (5 \times 5 \times 0.1) \text{ mm}^3$ . Consequently, the volume density of 4-MBA molecules in the powder ( $n_{powder}$ ) was estimated to be  $1.56 \times 10^{20} \text{ mm}^{-3}$  ( $n_{powder} = N_{powder}/V_{powder}$ ). In addition, the penetration depth of the focused beam into the 4-MBA powder ( $D_{depth}$ ) was estimated to be  $4.91 \mu\text{m}$  ( $NA = 0.4$  for the  $20 \times$  objective lens of the Raman spectrometer at the  $785 \text{ nm}$  wavelength). Subsequently,  $\sigma$  for the mole amount of 4-MBA molecules per  $\text{mm}^2$  in a monolayer was calculated as  $4.0 \times 10^{-12} \text{ mol} \cdot \text{mm}^{-2}$ . Accordingly, the value of  $N_{SERS}/N_{bulk}$  was estimated to be  $9.43 \times 10^{-6}$ . Hence, the EF value of the Ag NW-tape substrate was calculated as  $1.16 \times 10^6$ .

Table S1 Comparison of the performance in the detection of TMTD

| Substrate                              | Detection range              | LOD                                    | Ref.      |
|----------------------------------------|------------------------------|----------------------------------------|-----------|
| Ag NRs embedded PDMS                   | $10^{-2} \sim 10^{-7}$ M     | $2.4 \times 10^{-9}$ g/cm <sup>2</sup> | 1         |
| interfacial self-assembly Au NRs array | 0.001 ~ 30 ppm               | 0.029 ng/cm <sup>2</sup>               | 2         |
| 2D Au@Ag nanodot array                 | 0.005 ~ 1 ppm                | 0.0011 ppm                             | 3         |
| interfacial self-ordered GNP arrays    | 19 ~ 1900 ng/cm <sup>2</sup> | 1 nM                                   | 4         |
| CNF-Au NR based SERS platform          | 6 ~ 600 ng/cm <sup>2</sup>   | 6 ng/cm <sup>2</sup>                   | 5         |
| CNF/Au NP substrate                    | 0 ~ 10 ppm                   | 52 ppb                                 | 6         |
| stretched Ag NW-tape substrate         | $10^{-1} \sim 10^{-6}$ mg/mL | 0.0102 ng/cm <sup>2</sup>              | This work |

Table S2 Comparison of the performance in the Detection of TBZ

| Substrate                              | Detection range           | LOD                     | Ref. |
|----------------------------------------|---------------------------|-------------------------|------|
| interfacial self-assembly Au NRs array | 0.01 ~ 200 ppm            | 0.76 ng/cm <sup>2</sup> | 2    |
| 2D Au@Ag nanodot array                 | 0.05 ~ 10 ppm             | 0.051 ppm               | 3    |
| Ag/NC jelly like substrate             | 5 ~ 10 ng/cm <sup>2</sup> | 5 ng/cm <sup>2</sup>    | 7    |
| Au@Ag/PMMA/qPCR-PET film               | 0.05 ~ 10 ppm             | 20 ppb                  | 8    |

|                              |               |                          |                         |           |
|------------------------------|---------------|--------------------------|-------------------------|-----------|
| Biomimetic<br>assembles GNPs | material      | $10^{-5} \sim 10^{-9}$ M | $10^{-9}$ M             | 9         |
| Vertically aligned<br>arrays | Au NRs        | 0 ~ 1000 $\mu\text{g/L}$ | 149 $\mu\text{g/L}$     | 10        |
| stretched<br>substrate       | Ag<br>NW-tape | 1 ~ $10^{-5}$ mg/mL      | 0.0819 $\text{ng/cm}^2$ | This work |



The detail conversion process of the concentration was shown as below:

In this work, 10  $\mu\text{L}$  standard solution of pesticide (1 mg/mL) was dropped on the Ag NW-tape substrate with an area of  $1.5 \times 0.5 \text{ cm}^2$ .

The mass of pesticide on the substrate was:

$$m = C \times V = 1 \text{ mg/mL} \times 10 \mu\text{L} = 10 \times 10^3 \text{ ng};$$

The mass-to-area ratio ( $R_m/a$ ) of the pesticide on the Ag NW-tape substrate was:

$$R_m/a = \text{mass/area} = 10 \times 10^3 \text{ ng} / (1.5 \times 0.5) \text{ cm}^2 = 13.3 \times 10^3 \text{ ng/cm}^2;$$

Therefore, the limits of detection (LOD) of TMTD ( $7.67 \times 10^{-7} \text{ mg/mL}$ ) and TBZ ( $6.16 \times 10^{-6} \text{ mg/mL}$ ) could be evaluated to be:

$$7.67 \times 10^{-7} \times 13.3 \times 10^3 \text{ ng/cm}^2 = 1.02 \times 10^{-2} \text{ ng/cm}^2$$

$$6.16 \times 10^{-6} \times 13.3 \times 10^3 \text{ ng/cm}^2 = 8.19 \times 10^{-2} \text{ ng/cm}^2$$

For the in-situ detection of pesticide residues on food, 20  $\mu\text{L}$  mixtures of pesticide (1 mg/mL) was spiked on the food surface. The contaminated area was about  $1 \times 1 \text{ cm}^2$ .

Therefore, the mass of pesticide on the food surface was:

$$m = C \times V = 1 \text{ mg/mL} \times 20 \mu\text{L} = 20 \times 10^3 \text{ ng};$$

The mass-to-area ratio ( $R_m/a$ ) of the pesticide on the fruit surface was:

$$R_m/a = \text{mass/area} = 20 \times 10^3 \text{ ng} / 1 \text{ cm}^2 = 20 \times 10^3 \text{ ng/cm}^2;$$

After being dried, the pesticide was extracted through the “paste and peel off” method before SERS detection. Therefore, the detected amounts of TMTD ( $2 \times 10^{-3}$  and  $2 \times 10^{-5} \text{ mg/mL}$ ) and TBZ ( $5 \times 10^{-1}$  and  $5 \times 10^{-5} \text{ mg/mL}$ ) on the surface of the vegetables and fruits could be estimated to be:

$$2 \times 10^{-3} \times 20 \times 10^3 \text{ ng/cm}^2 = 40 \text{ ng/cm}^2$$

$$2 \times 10^{-5} \times 20 \times 10^3 \text{ ng/cm}^2 = 0.4 \text{ ng/cm}^2$$

$$5 \times 10^{-1} \times 20 \times 10^3 \text{ ng/cm}^2 = 10^4 \text{ ng/cm}^2$$

$$5 \times 10^{-5} \times 20 \times 10^3 \text{ ng/cm}^2 = 1 \text{ ng/cm}^2$$

## References

- 1 S. Kumar, P. Goel and J. P. Singh, Flexible and Robust SERS Active Substrates for Conformal Rapid Detection of Pesticide Residues from Fruits, *Sensor. Actuat. B-Chem.*, 2017, **241**, 577-583.
- 2 B. Hu, D.-W. Sun, H. Pu and Q. Wei, Rapid Nondestructive Detection of Mixed Pesticides Residues on Fruit Surface Using SERS Combined with Self-Modeling Mixture Analysis Method, *Talanta*, 2020, **217**, 120998.
- 3 K. Wang, D.-W. Sun, H. Pu and Q. Wei, Two-Dimensional Au@Ag Nanodot Array for Sensing Dual-Fungicides in Fruit Juices with Surface-Enhanced Raman Spectroscopy Technique, *Food Chem.*, 2019, **310**, 125923.
- 4 F. Yu, M. Su, L. Tian, H. Wang and H. Liu, Organic Solvent as Internal Standards for Quantitative and High-Throughput Liquid Interfacial SERS Analysis in Complex Media, *Anal. Chem.*, 2018, **90**, 5232-5238.
- 5 G. Kwon, J. Kim, D. Kim, Y. Ko, Y. Yamauchi and J. You, Nanoporous Cellulose Paper-Based SERS Platform for Multiplex Detection of Hazardous Pesticide, *Cellulose*, 2019, **26**, 4935-4944.
- 6 Z. Xiong, M. Lin, H. Lin and M. Huang, Facile Synthesis of Cellulose Nanofiber Nanocomposite as a SERS Substrate for Detection of Thiram in Juice, *Carbohydr. Polym.*, 2018, **189**, 79-86.
- 7 J. Chen, M. Huang, L. Kong and M. Lin, Jellylike Flexible Nanocellulose SERS Substrate for Rapid In-Situ Non-Invasive Pesticide Detection in Fruits/Vegetables, *Carbohydr. Polym.*, 2019, **205**, 596-600.

- 8 K. Wang, D.-W. Sun, H. Pu, Q. Wei and L. Huang, Stable, Flexible, and High-Performance SERS Chip Enabled by a Ternary Film-Packaged Plasmonic Nanoparticle Array, *ACS Appl. Mater. Inter.*, 2019, **11**, 29177-29186.
- 9 V. Sharma and V. Krishnan, Fabrication of Highly Sensitive Biomimetic SERS Substrates for Detection of Herbicides in Trace Concentration, *Sensor. Actuat. B-Chem.*, 2018, **262**, 710-719.
- 10 F. K. Alsammarraie, M. Lin, A. Mustapha, H. Lin, X. Chen, Y. Chen, H. Wang and M. Huang, Rapid Determination of Thiabendazole in Juice by SERS Coupled with Novel Gold Nanosubstrates, *Food Chem.*, 2018, **259**, 219-225.
